# Supplementary material for: Distribution of DC Subtypes: CD83+, DC-LAMP+, CD1a+, CD1c+, CD123+, and DC-SIGN+ in the Tumor Microenvironment of Endometrial Cancers—Correlation with Clinicopathologic Features
Source: MDPI journal article supplement (doi:10.3390/ijms24031933), 2023-01-18
Supplement: s1 [file s1]

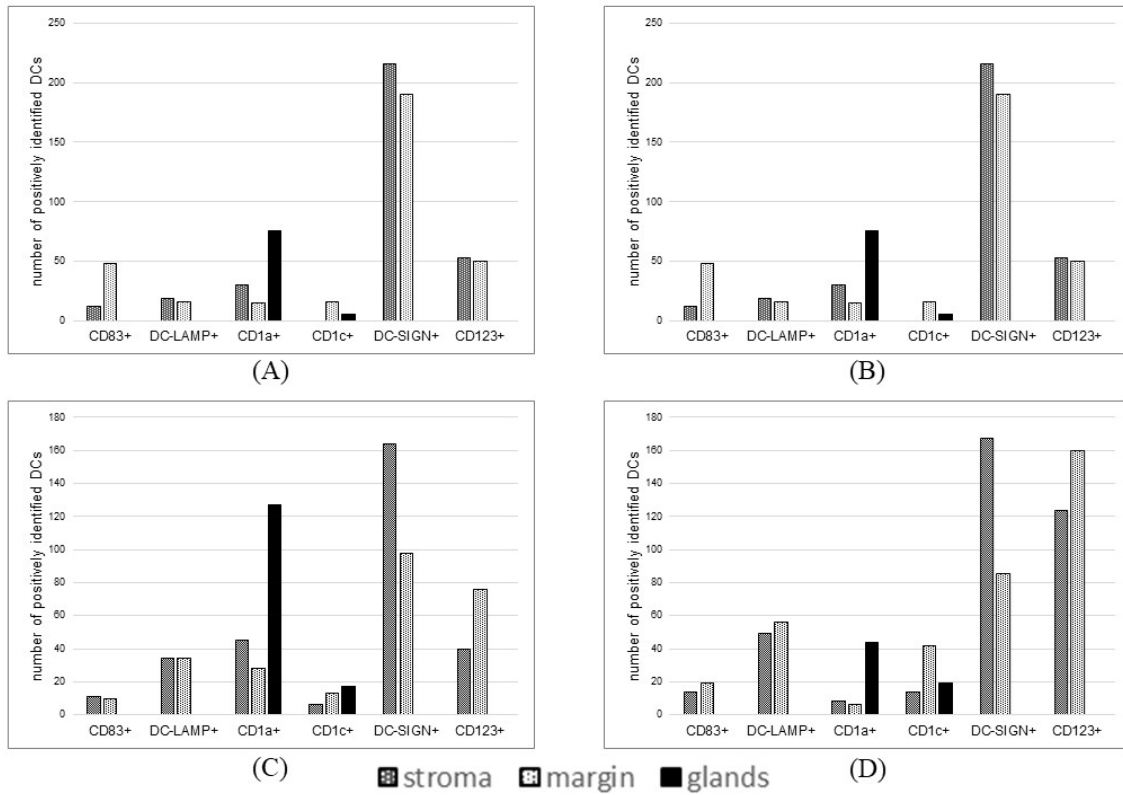

**Figure S1.** Counts [/1mm<sup>2</sup>] of DCs positively identified for the stated antibodies, in different ar-eas (stroma, margin, glands) of endometrial neoplasms: (A) clear cell carcinoma; (B) mucinous carcinoma; (C) mixed carcinoma; (D) carcinosarcoma.

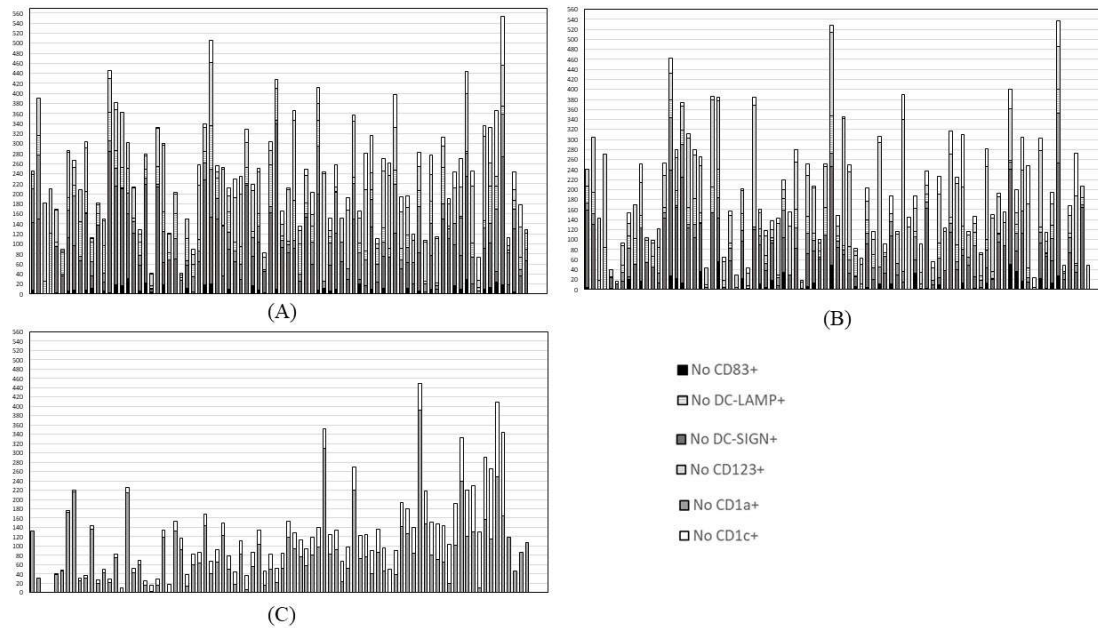

**Figure S2.** Counts [/1mm<sup>2</sup>] of DCs positively identified for the stated antibodies, presented for every sample individually, in different areas of cancerous tissues: (A) tumor stroma; (B) invasive margin; (C) tumor glands (CD1a+ and CD1c+ DCs were the only DCs subtypes found in glandular epithelium).

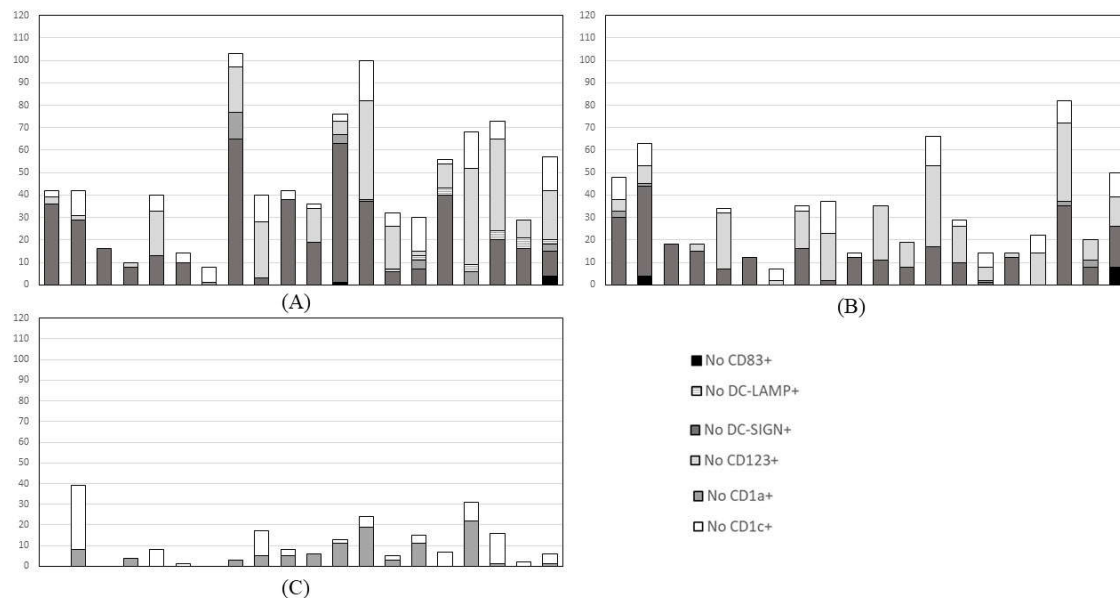

**Figure S3.** Counts [/1mm2] of DCs positively identified for the stated antibodies, presented for every sample individually, in **(A)** normal endometrial stroma; **(B)** normal endometrial margin; **(C)** normal endometrial glands (CD1a+ and CD1c+ DCs were the only DCs subtypes found in normal glandular epithelium). Areas of non-cancerous endometrium within ECs' slides were initially examined at 10× magnification; within areas most abundant in positively identified DCs, their number from five representative fields of view was summed up at high 40× magnification and expressed per 1 mm2.

**Table S2.** Associations between counts of different DCs subtypes and clinicopathological features of endometrioid cancers (ECs). For every DCs subtype, compared cancer groups were distinguished based on either histological grade (3 groups: grade 1, 2, 3), pT score (six groups: pT1, pT1a, pT1b, pT2, pT3a, pT3b), or pN score (3 groups: pN0, pN1, pN2). The numbers of samples allocated to different grade or stage scores are unevenly distributed between different antibodies subgroups, increasing the risk of biased results. The statistics were calculated using the Kruskal-Wallis ANOVA; \*  $p < 0.05$  was considered statistically significant  
pT, pN – elements of pathological TNM classification established for uterine cancers

| Table S2. Associations between counts of different DCs subtypes and clinicopathological features of ECs |                                 |           |
|---------------------------------------------------------------------------------------------------------|---------------------------------|-----------|
| dependent variable                                                                                      | independent (grouping) variable | p-value * |
| DC CD83+ stroma                                                                                         | Grade (3 groups)                | 0.7468    |
| DC DC-SIGN+ stroma                                                                                      |                                 | 0.9557    |
| DC CD1a+ stroma                                                                                         |                                 | 0.3100    |
| DC DC-LAMP+ stroma                                                                                      |                                 | 0.0540    |
| DC CD123+ stroma                                                                                        |                                 | 0.4190    |
| DC CD1c+ stroma                                                                                         |                                 | 0.1138    |
| DC CD83+ margin                                                                                         |                                 | 0.6624    |
| DC DC-SIGN+ margin                                                                                      |                                 | 0.5754    |
| DC CD1a+ margin                                                                                         |                                 | 0.1879    |
| DC DC-LAMP+ margin                                                                                      |                                 | 0.0897    |
| DC CD123+ margin                                                                                        |                                 | 0.4359    |

|                    |                      |        |
|--------------------|----------------------|--------|
| DC CD1c+ margin    |                      | 0.4471 |
| DC CD1a+ glands    |                      | 0.6203 |
| DC CD1c+ glands    |                      | 0.0977 |
| DC CD83+ stroma    | Stage: pT (6 groups) | 0.2054 |
| DC DC-SIGN+ stroma |                      | 0.8625 |
| DC CD1a+ stroma    |                      | 0.6990 |
| DC DC-LAMP+ stroma |                      | 0.7274 |
| DC CD123+ stroma   |                      | 0.7943 |
| DC CD1c+ stroma    |                      | 0.3045 |
| DC CD83+ margin    |                      | 0.1066 |
| DC DC-SIGN+ margin |                      | 0.8745 |
| DC CD1a+ margin    |                      | 0.4552 |
| DC DC-LAMP+ margin |                      | 0.7943 |
| DC CD123+ margin   |                      | 0.2407 |
| DC CD1c+ margin    |                      | 0.7928 |
| DC CD1a+ glands    |                      | 0.3568 |
| DC CD1c+ glands    |                      | 0.4303 |
| DC CD83+ stroma    | Stage: pN (3 groups) | 0.6773 |
| DC DC-SIGN+ stroma |                      | 0.2926 |
| DC CD1a+ stroma    |                      | 0.2545 |
| DC DC-LAMP+ stroma |                      | 0.5580 |
| DC CD123+ stroma   |                      | 0.5853 |
| DC CD1c+ stroma    |                      | 0.9522 |
| DC CD83+ margin    |                      | 0.4261 |
| DC DC-SIGN+ margin |                      | 0.6166 |
| DC CD1a+ margin    |                      | 0.3360 |
| DC DC-LAMP+ margin |                      | 0.8122 |
| DC CD123+ margin   |                      | 0.5893 |
| DC CD1c+ margin    |                      | 0.4168 |
| DC CD1a+ glands    |                      | 0.3053 |
| DC CD1c+ glands    |                      | 0.4110 |
