# Supplementary material for: Distribution of DC Subtypes: CD83+, DC-LAMP+, CD1a+, CD1c+, CD123+, and DC-SIGN+ in the Tumor Microenvironment of Endometrial Cancers—Correlation with Clinicopathologic Features
Source: Int J Mol Sci. 2023 Jan 18;24(3):1933. doi: 10.3390/ijms24031933 (PMC9915342; doi:10.3390/ijms24031933)
Supplement: Supplementary file 1 [file ijms-24-01933-s001.zip › Table S1^.xlsx]

## Sheet: Table S1. Test group
PATIENT No	age	age group	histologic type	grade	pT	pN	No CD83+ stroma	GROUP CD83+ stroma	No CD83+ border	GROUP CD83+ border	No DC-SIGN+ stroma	GROUP DC-SIGN+ stroma	No DC-SIGN+ border	GROUP DC-SIGN+ border	No CD1a+ stroma	GROUP CD1a+ stroma	No CD1a+ border	GROUP CD1a+ border	No CD1a+ glands	GROUP CD1a+ glands	No DC-LAMP+ stroma	GROUP DC-LAMP+ stroma	No DC-LAMP+ border	GROUP DC-LAMP+ border	No CD123+ stroma	GROUP CD123+ stroma	No CD123+ border	GROUP CD123+ border	No CD1c+ stroma	GROUP CD1c+ stroma	No CD1c+ border	GROUP CD1c+ border	No CD1c+ glands	GROUP CD1c+ glands
1	40	<40, 50)	endometrioid carcinoma	1	1a	0	0	1	0	1	121	3	123	4	23	2	8	2	42	2	7	1	34	4	60	3	138	4	2	1	8	2	11	1
2	48	<40, 50)	endometrioid carcinoma	2	1a	0	0	1	0	1	65	2	30	2	20	2	0	1	17	1	18	2	missing data	missing data	89	4	96	3	38	4	29	4	28	2
3	49	<40, 50)	endometrioid carcinoma	missing data	2	0	8	2	5	2	134	4	154	4	68	4	14	2	132	4	29	3	33	4	6	1	35	2	0	1	0	1	0	1
4	49	<40, 50)	endometrioid carcinoma	2	1a	missing data	0	1	0	1	217	4	missing data	missing data	3	1	0	1	6	1	33	3	2	1	49	2	13	1	26	3	3	1	30	2
5	52	<50, 60)	mucinous carcinoma	1	1a	0	15	2	0	1	209	4	81	3	98	4	12	2	83	3	61	4	14	1	40	2	17	1	30	4	7	2	31	3
6	54	<50, 60)	endometrioid carcinoma	1	3a	0	0	1	0	1	138	4	45	2	0	1	0	1	20	1	23	2	22	3	17	1	27	2	3	1	4	1	7	1
7	55	<50, 60)	endometrioid carcinoma	3	3b	2	8	2	17	2	152	4	107	4	2	1	0	1	31	1	43	4	25	3	86	3	65	3	12	2	38	4	6	1
8	55	<50, 60)	endometrioid carcinoma	2	2	0	16	2	22	2	194	4	143	4	1	1	2	2	1	1	41	4	31	4	110	4	66	3	0	1	15	3	9	1
9	55	<50, 60)	endometrioid carcinoma	1	1a	0	9	2	35	2	80	3	68	3	34	3	56	4	51	2	40	3	23	3	33	2	18	1	15	3	19	3	28	2
10	55	<50, 60)	endometrioid carcinoma	1	1b	0	0	1	0	1	10	1	20	1	7	1	2	2	71	2	5	1	15	3	88	3	105	4	5	2	8	2	76	4
11	56	<50, 60)	endometrioid carcinoma	2	1b	1	18	2	55	2	45	2	87	3	62	4	41	4	119	4	39	3	58	4	133	4	136	4	4	2	8	2	15	2
12	56	<50, 60)	endometrioid carcinoma	2	1b	0	0	1	0	1	30	1	15	1	21	2	22	3	53	2	0	1	0	1	116	4	303	4	25	3	49	4	45	3
13	56	<50, 60)	endometrioid carcinoma	2	1a	0	9	2	36	2	68	2	41	2	74	4	36	4	240	4	4	1	17	3	59	3	23	1	56	4	46	4	92	4
14	57	<50, 60)	endometrioid carcinoma	2	1b	0	0	1	0	1	missing data	missing data	missing data	missing data	missing data	missing data	missing data	missing data	missing data	missing data	121	4	84	4	89	4	187	4	0	1	0	1	0	1
15	57	<50, 60)	endometrioid carcinoma	1	1a	0	9	2	3	2	124	3	160	4	55	4	11	2	41	2	21	2	17	3	33	2	17	1	75	4	29	4	49	3
16	57	<50, 60)	missing data	missing data	missing data	0	0	1	0	1	93	3	51	2	16	2	0	1	58	2	31	3	9	1	15	1	13	1	34	4	9	2	51	4
17	57	<50, 60)	endometrioid carcinoma	2	1a	0	missing data	missing data	missing data	missing data	missing data	missing data	missing data	missing data	missing data	missing data	missing data	missing data	missing data	missing data	missing data	missing data	missing data	missing data	missing data	missing data	missing data	missing data	missing data	missing data	missing data	missing data	missing data	missing data
18	58	<50, 60)	endometrioid carcinoma	2	1	0	3	2	2	2	92	3	22	2	0	1	2	2	39	1	8	1	0	1	64	3	14	1	3	1	0	1	2	1
19	58	<50, 60)	endometrioid carcinoma	2	1b	0	10	2	48	2	329	4	198	4	8	1	27	4	21	1	63	4	74	4	missing data	missing data	168	4	17	3	14	3	31	3
20	58	<50, 60)	endometrioid carcinoma	1	1a	0	0	1	0	1	64	2	30	2	40	3	22	3	23	1	0	1	0	1	47	2	59	3	0	1	5	1	45	3
21	59	<50, 60)	endometrioid carcinoma	1	1a	0	0	1	0	1	150	4	130	4	127	4	21	3	32	1	39	3	43	4	74	3	110	4	0	1	0	1	0	1
22	59	<50, 60)	endometrioid carcinoma	1	1a	0	0	1	0	1	82	3	70	3	17	2	9	2	119	4	7	1	8	2	102	4	255	4	4	2	3	1	34	3
23	59	<50, 60)	endometrioid carcinoma	2	3a	0	0	1	0	1	24	1	10	1	35	3	8	2	86	3	32	3	0	1	9	1	26	2	10	2	12	2	50	3
24	59	<50, 60)	endometrioid carcinoma	1	1a	0	17	2	50	2	82	3	190	4	41	3	14	2	101	3	1	1	4	2	70	3	103	4	33	4	39	4	90	4
25	60	<60, 70)	endometrioid carcinoma	1	1a	0	0	1	0	1	36	1	12	1	4	1	0	1	46	2	42	4	0	1	4	1	0	1	4	2	5	1	3	1
26	60	<60, 70)	endometrioid carcinoma	1	3b	missing data	12	2	22	2	46	2	74	3	8	1	22	3	14	1	44	4	34	4	39	2	46	2	0	1	4	1	24	2
27	60	<60, 70)	endometrioid carcinoma	2	2	missing data	18	2	12	2	209	4	77	3	34	3	19	3	143	4	23	2	14	3	48	2	32	2	8	2	6	2	25	2
28	60	<60, 70)	endometrioid carcinoma	2	2	missing data	16	2	6	2	60	2	66	3	37	3	41	4	56	2	11	2	34	4	82	3	82	3	12	2	23	3	30	2
29	60	<60, 70)	endometrioid carcinoma	2	1b	0	0	1	0	1	73	2	38	2	missing data	missing data	missing data	missing data	missing data	missing data	19	2	0	1	145	4	78	3	25	3	7	2	51	4
30	60	<60, 70)	endometrioid carcinoma	1	3b	0	7	2	3	2	75	3	23	2	93	4	61	4	391	4	32	3	27	3	47	2	19	1	28	3	14	3	59	4
31	60	<60, 70)	endometrioid carcinoma	2	1a	0	0	1	0	1	20	1	15	1	53	4	9	2	131	4	29	3	20	3	114	4	128	4	30	4	76	4	99	4
32	60	<60, 70)	endometrioid carcinoma	2	3a	0	0	1	0	1	missing data	missing data	missing data	missing data	missing data	missing data	missing data	missing data	missing data	missing data	0	1	0	1	0	1	48	2	missing data	missing data	missing data	missing data	missing data	missing data
33	61	<60, 70)	carcinosarcoma	missing data	1b	1	21	2	35	2	215	4	132	4	17	2	13	2	83	3	60	4	68	4	122	4	159	4	4	2	21	3	6	1
34	61	<60, 70)	endometrioid carcinoma	1	1b	0	0	1	0	1	70	2	57	3	41	3	26	3	132	4	50	4	11	2	38	2	54	3	3	1	9	2	21	2
35	61	<60, 70)	endometrioid carcinoma	2	1a	0	12	2	13	2	50	2	56	2	31	3	12	2	127	4	24	2	45	4	55	3	79	3	23	3	105	4	53	4
36	61	<60, 70)	endometrioid carcinoma	2	1b	0	10	2	22	2	81	3	72	3	41	3	20	3	158	4	14	2	11	2	168	4	152	4	22	3	25	4	132	4
37	62	<60, 70)	clear cell carcinoma	3	3b	1	12	2	48	2	216	4	190	4	30	3	15	3	76	3	19	2	16	3	53	3	50	3	0	1	16	3	5	1
38	62	<60, 70)	endometrioid carcinoma	2	3a	0	2	2	0	1	43	2	62	3	4	1	3	2	15	1	0	1	12	2	25	1	17	1	8	2	6	2	31	3
39	62	<60, 70)	endometrioid carcinoma	1	2	0	0	1	0	1	93	3	84	3	15	2	12	2	52	2	8	1	12	2	23	1	18	1	26	3	23	3	32	3
40	62	<60, 70)	endometrioid carcinoma	2	1a	0	12	2	10	2	64	2	13	1	28	2	40	4	46	2	28	3	31	4	114	4	97	3	24	3	35	4	50	3
41	62	<60, 70)	endometrioid carcinoma	1	1	0	missing data	missing data	missing data	missing data	20	1	48	2	42	3	17	3	85	3	missing data	missing data	missing data	missing data	45	2	44	2	13	3	8	2	54	4
42	62	<60, 70)	endometrioid carcinoma	1	2	0	30	2	17	2	205	4	95	4	45	3	45	4	121	4	4	1	0	1	116	4	81	3	44	4	66	4	99	4
43	63	<60, 70)	endometrioid carcinoma	3	1a	0	0	1	0	1	67	2	51	2	8	1	0	1	25	1	70	4	51	4	64	3	67	3	0	1	0	1	6	1
44	63	<60, 70)	endometrioid carcinoma	2	1b	missing data	0	1	0	1	19	1	20	1	64	4	12	2	119	4	5	1	0	1	8	1	4	1	17	3	12	2	missing data	missing data
45	64	<60, 70)	endometrioid carcinoma	3	1b	missing data	22	2	37	2	197	4	95	4	13	1	2	2	15	1	17	2	19	3	26	2	95	3	4	2	18	3	11	1
46	64	<60, 70)	endometrioid carcinoma	2	1a	0	20	2	4	2	134	4	34	2	95	4	15	3	41	2	86	4	16	3	126	4	39	2	44	4	10	2	26	2
47	64	<60, 70)	endometrioid carcinoma	2	1a	0	0	1	0	1	30	1	82	3	29	2	42	4	82	3	36	3	37	4	104	4	93	3	36	4	25	4	29	2
48	64	<60, 70)	endometrioid carcinoma	2	3a	1	0	1	0	1	121	3	115	4	98	4	18	3	38	1	29	3	11	2	85	3	127	4	64	4	46	4	52	4
49	64	<60, 70)	endometrioid carcinoma	1	1a	0	missing data	missing data	missing data	missing data	missing data	missing data	missing data	missing data	missing data	missing data	missing data	missing data	missing data	missing data	missing data	missing data	missing data	missing data	missing data	missing data	missing data	missing data	missing data	missing data	missing data	missing data	missing data	missing data
50	65	<60, 70)	endometrioid carcinoma	2	1a	missing data	0	1	0	1	162	4	109	4	13	1	0	1	51	2	83	4	56	4	28	2	81	3	17	3	6	2	31	3
51	65	<60, 70)	endometrioid carcinoma	3	2	0	0	1	0	1	17	1	2	1	52	4	0	1	76	3	17	2	10	2	123	4	22	1	72	4	58	4	48	3
52	65	<60, 70)	endometrioid carcinoma	2	1a	0	0	1	0	1	150	4	95	4	30	3	15	3	66	2	72	4	3	1	43	2	73	3	17	3	6	2	77	4
53	66	<60, 70)	endometrioid carcinoma	2	3a	missing data	6	2	0	1	18	1	13	1	17	2	19	3	42	2	55	4	53	4	51	2	36	2	2	1	0	1	8	1
54	66	<60, 70)	endometrioid carcinoma	1	1a	0	0	1	0	1	68	2	5	1	missing data	missing data	missing data	missing data	missing data	missing data	14	2	14	3	37	2	37	2	3	1	9	2	18	2
55	66	<60, 70)	endometrioid carcinoma	2	2	0	20	2	32	2	10	1	28	2	53	4	45	4	74	2	19	2	12	2	49	2	45	2	14	3	26	4	48	3
56	66	<60, 70)	endometrioid carcinoma	2	1a	0	0	1	0	1	missing data	missing data	missing data	missing data	7	1	0	1	10	1	6	1	0	1	14	1	5	1	47	4	18	3	121	4
57	67	<60, 70)	endometrioid carcinoma	2	1b	0	18	2	27	2	198	4	212	4	35	3	105	4	75	3	35	3	36	4	82	3	53	3	14	3	29	4	8	1
58	67	<60, 70)	endometrioid carcinoma	1	1b	0	1	1	18	2	148	4	76	3	41	3	4	2	66	2	42	4	5	2	12	1	16	1	12	2	19	3	26	2
59	67	<60, 70)	endometrioid carcinoma	1	1a	0	7	2	0	1	51	2	32	2	44	3	35	4	82	3	12	2	7	2	12	1	0	1	26	3	17	3	43	3
60	67	<60, 70)	endometrioid carcinoma	1	1a	0	0	1	0	1	50	2	40	2	19	2	16	3	141	4	23	2	34	4	72	3	123	4	30	4	11	2	53	4
61	68	<60, 70)	endometrioid carcinoma	2	1b	0	0	1	0	1	missing data	missing data	missing data	missing data	27	2	0	1	93	3	5	1	4	2	6	1	25	1	3	1	0	1	24	2
62	68	<60, 70)	endometrioid carcinoma	1	1a	0	10	2	12	2	111	3	95	4	81	4	29	4	92	3	3	1	0	1	9	1	15	1	43	4	37	4	43	3
63	68	<60, 70)	endometrioid carcinoma	1	1b	0	0	1	1	2	4	1	4	1	16	2	13	2	147	4	6	1	10	2	78	3	42	2	3	1	4	1	71	4
64	69	<60, 70)	endometrioid carcinoma	3	1	0	31	2	13	2	129	3	211	4	41	3	67	4	215	4	50	4	27	3	51	2	49	3	0	1	7	2	10	1
65	69	<60, 70)	endometrioid carcinoma	1	3b	0	0	1	0	1	5	1	3	1	29	2	0	1	59	2	26	3	4	2	18	1	25	1	12	2	11	2	24	2
66	70	<70, 80)	endometrioid carcinoma	2	1b	0	0	1	6	2	25	1	20	1	14	2	2	2	77	3	61	4	41	4	26	2	8	1	9	2	6	2	36	3
67	70	<70, 80)	endometrioid carcinoma	1	1b	0	12	2	12	2	missing data	missing data	missing data	missing data	14	2	34	4	309	4	missing data	missing data	0	1	214	4	247	4	4	2	14	3	43	3
68	70	<70, 80)	endometrioid carcinoma	2	3a	missing data	0	1	0	1	111	3	87	3	19	2	0	1	20	1	5	1	0	1	44	2	47	2	12	2	21	3	83	4
69	70	<70, 80)	endometrioid carcinoma	3	1b	0	0	1	0	1	67	2	164	4	23	2	5	2	107	3	31	3	14	3	8	1	23	1	missing data	missing data	missing data	missing data	missing data	missing data
70	72	<70, 80)	mixed carcinoma	3	1b	2	11	2	10	2	164	4	98	4	45	3	28	4	127	4	34	3	34	4	40	2	76	3	6	2	13	2	17	2
71	73	<70, 80)	endometrioid carcinoma	2	1b	0	0	1	0	1	213	4	153	4	5	1	0	1	15	1	37	3	52	4	76	3	175	4	2	1	6	2	15	2
72	73	<70, 80)	endometrioid carcinoma	2	1a	0	23	2	14	2	23	1	44	2	123	4	44	4	248	4	46	4	26	3	20	1	43	2	131	4	24	3	161	4
73	74	<70, 80)	endometrioid carcinoma	1	3a	0	3	2	0	1	282	4	143	4	21	2	11	2	22	1	57	4	10	2	67	3	65	3	16	3	24	3	8	1
74	74	<70, 80)	endometrioid carcinoma	1	2	1	4	2	0	1	5	1	0	1	3	1	4	2	3	1	4	1	6	2	24	1	33	2	2	1	0	1	13	2
75	74	<70, 80)	endometrioid carcinoma	1	3b	0	0	1	0	1	37	1	7	1	98	4	16	3	123	4	2	1	7	2	112	4	103	4	4	2	9	2	27	2
76	74	<70, 80)	endometrioid carcinoma	1	1	0	1	1	4	2	58	2	88	3	44	3	21	3	80	3	32	3	27	3	23	1	37	2	45	4	27	4	39	3
77	74	<70, 80)	endometrioid carcinoma	1	1b	0	5	2	0	1	126	3	74	3	39	3	30	4	46	2	16	2	8	2	23	1	36	2	34	4	19	3	missing data	missing data
78	75	<70, 80)	endometrioid carcinoma	1	1a	0	8	2	13	2	95	3	65	3	32	3	20	3	104	3	25	3	14	3	83	3	92	3	8	2	2	1	31	3
79	75	<70, 80)	endometrioid carcinoma	2	3a	0	0	1	0	1	153	4	missing data	missing data	8	1	0	1	58	2	20	2	11	2	56	3	39	2	12	2	13	2	37	3
80	75	<70, 80)	endometrioid carcinoma	2	1b	0	0	1	0	1	36	1	35	2	12	1	13	2	87	3	25	3	5	2	61	3	135	4	44	4	85	4	missing data	missing data
81	76	<70, 80)	endometrioid carcinoma	2	1a	0	0	1	0	1	0	1	0	1	0	1	0	1	0	1	25	3	19	3	156	4	123	4	0	1	0	1	0	1
82	76	<70, 80)	carcinosarcoma	missing data	1b	0	7	2	4	2	120	3	39	2	0	1	0	1	5	1	39	3	44	4	125	4	160	4	24	3	62	4	33	3
83	77	<70, 80)	endometrioid carcinoma	3	1a	0	12	2	1	2	25	1	53	2	28	2	0	1	136	4	39	3	45	4	7	1	5	1	2	1	0	1	7	1
84	77	<70, 80)	endometrioid carcinoma	1	2	0	8	2	0	1	192	4	20	1	95	4	23	3	98	3	52	4	27	3	33	2	31	2	32	4	16	3	42	3
85	78	<70, 80)	endometrioid carcinoma	1	3a	0	7	2	0	1	106	3	16	1	54	4	18	3	172	4	25	3	14	3	90	4	40	2	4	2	5	1	4	1
86	78	<70, 80)	endometrioid carcinoma	2	1b	0	6	2	0	1	52	2	104	4	19	2	26	3	59	2	26	3	52	4	17	1	87	3	8	2	10	2	11	1
87	78	<70, 80)	endometrioid carcinoma	2	1b	0	0	1	0	1	65	2	120	4	21	2	5	2	63	2	23	2	0	1	108	4	244	4	41	4	15	3	24	2
88	78	<70, 80)	endometrioid carcinoma	3	1b	0	0	1	0	1	91	3	32	2	17	2	27	4	94	3	79	4	27	3	160	4	149	4	19	3	14	3	34	3
89	81	>80	endometrioid carcinoma	2	1a	0	14	2	3	2	87	3	64	3	40	3	5	2	116	3	75	4	1	1	46	2	24	1	70	4	18	3	149	4
90	81	>80	endometrioid carcinoma	2	1b	missing data	18	2	28	2	256	4	225	4	85	4	100	4	165	4	15	2	47	4	82	3	86	3	98	4	52	4	179	4
91	83	>80	endometrioid carcinoma	2	1a	missing data	9	2	13	2	68	2	30	2	63	4	36	4	80	3	45	4	21	3	54	3	146	4	39	4	35	4	72	4
92	84	>80	endometrioid carcinoma	1	2	missing data	0	1	0	1	150	4	missing data	missing data	71	4	missing data	missing data	221	4	12	2	1	1	112	4	124	4	12	2	19	3	48	3
93	86	>80	endometrioid carcinoma	2	1b	0	8	2	21	2	88	3	5	1	100	4	56	4	216	4	21	2	25	3	36	2	26	2	14	3	21	3	5	1
94	missing data	missing data	missing data	missing data	missing data	missing data	0	1	0	1	21	1	36	2	34	3	9	2	169	4	55	4	22	3	17	1	13	1	7	2	11	2	24	2

## Sheet: control group
PATIENT No	age	age group	histologic type	No CD83+ stroma	No CD83+ border	No DC-SIGN+ stroma	No DC-SIGN+ border	No CD1a+ stroma	No CD1a+ border	No CD1a+ glands	No DC-LAMP+ stroma	No DC-LAMP+ border	No CD123+ stroma	No CD123+ border	No CD1c+ stroma	No CD1c+ border	No CD1c+ glands
1	64	<60, 70)	endometrioid carcinoma	0	0	36	30	0	3	0	0	0	3	5	3	10	0
2	59	<50, 60)	endometrioid carcinoma	0	4	29	40	0	1	8	0	0	2	8	11	10	31
3	74	<70, 80)	endometrioid carcinoma	0	0	16	18	0	0	0	0	0	0	0	0	0	0
4	73	<70, 80)	endometrioid carcinoma	0	0	8	15	0	0	4	0	0	2	3	0	0	0
5	62	<60, 70)	endometrioid carcinoma	0	0	13	7	0	0	0	0	0	20	25	7	2	8
6	58	<50, 60)	endometrioid carcinoma	0	0	10	12	0	0	0	0	0	0	0	4	0	1
7	69	<60, 70)	endometrioid carcinoma	0	0	0	0	1	0	0	0	0	0	2	7	5	0
8	61	<60, 70)	endometrioid carcinoma	0	0	65	16	12	0	3	0	0	20	17	6	2	0
9	59	<50, 60)	endometrioid carcinoma	0	0	3	2	0	0	5	0	0	25	21	12	14	12
10	63	<60, 70)	endometrioid carcinoma	0	0	38	12	0	0	5	0	0	0	0	4	2	3
11	60	<60, 70)	endometrioid carcinoma	0	0	19	11	0	0	6	0	0	15	24	2	0	0
12	84	>80	endometrioid carcinoma	1	0	62	8	4	0	11	0	0	6	11	3	0	2
13	40	<40, 50)	endometrioid carcinoma	0	0	37	17	1	0	19	0	0	44	36	18	13	5
14	58	<50, 60)	endometrioid carcinoma	0	0	6	10	0	0	3	1	0	19	16	6	3	2
15	54	<50, 60)	endometrioid carcinoma	0	0	7	1	4	1	11	2	0	2	6	15	6	4
16	83	>80	endometrioid carcinoma	0	0	40	12	0	0	0	3	0	11	2	2	0	7
17	65	<60, 70)	endometrioid carcinoma	0	0	0	0	6	0	22	3	0	43	14	16	8	9
18	60	<60, 70)	endometrioid carcinoma	0	0	20	35	0	2	1	4	0	41	35	8	10	15
19	62	<60, 70)	endometrioid carcinoma	0	0	16	8	0	3	0	5	0	8	9	0	0	2
20	66	<60, 70)	endometrioid carcinoma	4	8	11	18	3	0	1	2	0	22	13	15	11	5
